# Supplementary material for: Role of accelerated segment switch in exons to alter targeting (ASSET) in the molecular evolution of snake venom proteins
Source: PubMed Central journal article supplement (PMC2711939; doi:10.1186/1471-2148-9-146), 2009-06-30
Supplement: 1471-2148-9-146-S1.pdf [file 1471-2148-9-146-S1.pdf]

**Additional file1:** Three-finger toxins from *Naja* species showing point mutations. The residues showing point mutations are shown in white and red type whereas those that are conserved are in black.

|          |                         |                                     |                 |              |                |
|----------|-------------------------|-------------------------------------|-----------------|--------------|----------------|
| AAA49386 |                         | LTCLICPEKYCNKVHTCLNGENICFKRFN---    | RILGKRYDLGCAAT  | CP-TVKTG-IVQ | CCSTDKCNH----- |
| 0706221A |                         | LTCLICPEKYCNKVHTCLNGEKICFKRYSER---  | KLLGKRYIRGCADT  | CP-VRKPREIVO | CCSTDKCNH----- |
| AAB25735 |                         | LTCLNCPEVYCRRFQKCRNGEKICFKKFDQR---  | NLLGKRYEIGCAAT  | CP-EAKPREIVO | CCSTDKCNR----- |
| 764177A  |                         | LTCLNCPEVYCRRFQICRDGEKICFKKFDQR---  | NLLGKRYRRGCAAT  | CP-EAKPREIVO | CCSTDKCNR----- |
| 093422   | MKTLLLTLLVVVT-IVCLALGYT | LTCLICPEKYCNKVHTCLNGEKICFKKYDQR---  | KLLGKRYIRGCADT  | CP-VRKPREIVE | CCSTDKCNH----- |
| CAA04578 | MKTLLLSLVVVT-IVCLDLGYT  | LTCLNCPMFQCGKFQICRNGEKICFKKLHQR---  | RPFSRLRYIRGCAAT | CP-ETKPRDMVE | CCSTDRCNR----- |
| P60814   | MKTLPPLTLVVVT-IVCLDLGYT | LTCLNCPMFQCGKFQICRNGEKICFKKLHQR---  | RPFSRLRYIRGCAAT | CP-GTKPRDMVE | CCSTDRCNR----- |
| Q802B3   | MKTLLLTLLVVVT-IVCLDLGYT | LTCLNCPMFQCGKFQTCRNGEKICFKMLQQR---  | RPFSRLRYIRGCAAT | CP-GTKPRDMVE | CCSTDRCNR----- |
| O42255   | MKTLLLTLLVVVT-IVCLDLGYT | LTCLNCPMFQCGKFQTCRNGEKICFKKLQQR---  | RPFSRLRYIRGCAAT | CP-GTKPRDMVE | CCSTDRCNR----- |
| Q9W7I3   | MKTLLLTLLVVVT-IVCLDLGYT | LTCLNCPMFQCGKFQTCRNGEKICFKMLQQR---  | RPFSRLRYIRGCAAT | CP-GTKPRDMVE | CCNTDRCNR----- |
| P60773   |                         | LECHNQSSQAPTPTKTCSG-ETNCYKKWWS----  | DHRGTIIERGCG    | CPKVKPGVKLN  | CCRTDRCNN----- |
| Q9YGJ6   |                         | LECHDQSSSETPTTTGCSGGETNCYKKSWS----  | DHRGYRIERGCG    | CPSVKKGIEIN  | CCTTDRCNN----- |
| P60774   |                         | LECHNQSSQAPTPTKTCSG-ETNCYKKWWS----  | DHRGTIIERGCG    | CPKVKPGVKLN  | CCTTDRCNN----- |
| AAD09179 |                         | MECHNQSSQAPTPTKTCSG-ETNCYKKWWS----  | DHRGTIIERGCG    | CPKVKPGVNLN  | CCTTDRCNN----- |
| AAD09180 |                         | MECHNQSSQPTPTTTGCSGGETNCYKKSWS----  | DHRGTIIERGCG    | CPKVKPGVNLN  | CCTTDRCNN----- |
| AAA66026 |                         | LECHDQSSQAPTPTTTGCSGGETNCYKKSWS---- | DHRGYRIERGCG    | CPSVKKGIEIN  | CCTTDRCNN----- |
| ABY61977 |                         | LECHDQSSQPTPTTTGCSGGETNCYKKRWR----  | DHRGYRTERGCG    | CPSVKNKIEIN  | CCTTDRCNN----- |
| P29182   |                         | LECHNQSSQPPTTKTCSG-ETNCYKKWWS----   | DHRGTIIERGCG    | CPKVKPGVNLN  | CCRTDRCNN----- |
| P80958   | MKTLLLTLLVVVT-IVCLDLGYT | LECHNQSSQPTPTTKTCSG-ETNCYKKWWS----  | DHRGTIIERGCG    | CPKVKPGVNLN  | CCTTDRCNN----- |
| AAD08812 | MKTLLLTLLVVVT-IVCLDLGYT | LECHNQSSSETPTTTGCSGGETNCYKKSWS----  | DHRGYRIERGCG    | CPSVKKGIEIN  | CCTTDRCNN----- |
| AAD08813 | MKTLLLTLLVVVT-IVCLDLGYT | LECHNQSSQAPTPTTTGCSGGETNCYKKSWS---- | DHRGYRIERGCG    | CPSVKKGIEIN  | CCTTDRCNN----- |
| AAC69916 | MKTLLLTLLVVVT-IVCLDLGYT | LECHNQSSQAPTPTTTGCSGGETNCYKKGWR---- | DHRGYRIERGCG    | CPSVKKGIEIN  | CCTTDRCNN----- |
| AAB01538 | MKTLLLTLLVVVT-IVCLDLGYT | LECHNQSSQPTPTTTGCSGGETNCYKKRWR----  | DHRGYRTERGCG    | CPSVKNKIEIN  | CCTTDRCNN----- |
| AAF21774 | METLLLTLLVVVT-IVCLDLGYT | LECHNQSSQPTPTTTGCSGGETNCYKKRWR----  | DHRGYRTERGCG    | CPSVKNKIEIN  | CCTTDRCNN----- |
| CAB45156 | MKTLLLSLVVVT-IVCLDLGYT  | RLCLSDYSIFSETIEICPDGHNFCFKKFPKG---  | ITRLPWVIRGCAAT  | CPKAEARVYVD  | CCARDKCNR----- |
| CAC85538 | MKTLLLTLLVVVT-IVCLDLGYT | RKCHN--SPLSLVYQTCPIGQNICFKINVK---   | EAPSLPVKRAAAT   | CPKSSALVKVY  | CCRTDKCN-----  |
| CAA90967 | MKTLLLTLLVVVT-IVCLDLGYT | LKCHN--TQLPFIYNTCPGKNLCFKATLK---    | FPLKFPVKGCAAT   | CPRSSSLVKVY  | CCRTDKCN-----  |
| AAB36928 | MKTLLLTLLVVVT-IVCLDLGYT | LKCHN--TQLPFIYKTCPEGKNLCFKATLK---   | FPLKFPVKGCAADN  | CPKNSALLKYV  | CCSTDKCN-----  |
| AAB36929 | MKTLLLTLLVVVT-IVCLDLGYT | LKCHN--TQLPFIYKTCPEGKNLCFKATLK---   | FPLKFPVKGCAADN  | CPKNSALLKYV  | CCSTEKCN-----  |
| P25669   |                         | LKCN--KLIPLAYKTCPAGKNLCYKMFMV----   | AAPKVPVKGRCID   | CPKNSLLVKYV  | CCNTDRCN-----  |
| P60309   |                         | LKCK--KLVPLFSKTCPPGKNLCYKMFMV----   | AAPKVPVKGRCINV  | CPKSSLLVKYV  | CCNTDKCN-----  |
| P60308   |                         | LKCK--KLVPLFSKTCPPGKNLCYKMFMV----   | ATPKVPVKGRCIDV  | CPKSSLLVKYV  | CCNTDKCN-----  |

|          |         |      |      |     |     |    |     |     |    |   |    |   |   |    |    |   |      |    |   |   |   |   |   |   |   |   |   |   |   |   |    |   |   |   |   |   |   |      |      |    |   |    |    |    |    |       |   |   |   |   |    |    |    |   |   |   |   |   |   |   |   |    |    |    |    |    |        |       |       |
|----------|---------|------|------|-----|-----|----|-----|-----|----|---|----|---|---|----|----|---|------|----|---|---|---|---|---|---|---|---|---|---|---|---|----|---|---|---|---|---|---|------|------|----|---|----|----|----|----|-------|---|---|---|---|----|----|----|---|---|---|---|---|---|---|---|----|----|----|----|----|--------|-------|-------|
| AAB33650 |         | LKCN | --   | KL  | VPL | FY | KTC | PAG | KN | L | CY | K | M | F  | M  | V | ---- | AT | P | K | V | P | V | K | R | G | C | I | D | V | CP | K | S | S | L | L | V | K    | Y    | V  | - | CC | NT | DR | CN | ----- |   |   |   |   |    |    |    |   |   |   |   |   |   |   |   |    |    |    |    |    |        |       |       |
| CAA69977 | MKTLLLT | TLV  | VVT  | -   | IV  | CL | DL  | GY  | T  | L | K  | C | N | -- | Q  | L | I    | P  | P | F | Y | K | T | C | A | A | G | K | N | L | C  | Y | K | M | F | M | V | ---- | AA   | Q  | R | F  | P  | V  | K  | R     | G | C | I | D | V  | CP | K  | S | S | L | L | V | K | Y | V | -  | CC | NT | DR | CN | N----- |       |       |
| CAA90965 | MKTLLLT | TLV  | VVT  | -   | IV  | CL | DL  | GY  | T  | L | K  | C | N | -- | Q  | L | I    | P  | P | F | Y | K | T | C | A | A | G | K | N | L | C  | Y | K | M | F | M | V | ---- | AA   | P  | K | V  | P  | V  | K  | R     | G | C | I | D | V  | CP | K  | S | S | L | L | V | K | Y | V | -  | CC | NT | DR | C  | S      | ----- |       |
| CAB42058 | MKTLLLT | TLV  | VVT  | -   | IV  | CL | DL  | GY  | T  | L | K  | C | N | -- | Q  | L | I    | P  | P | F | Y | K | T | C | A | A | G | K | N | L | C  | Y | K | M | F | M | V | ---- | AA   | P  | K | V  | P  | V  | K  | R     | G | C | I | D | V  | CP | K  | S | S | L | L | V | K | Y | V | -  | CC | NT | DR | C  | N      | ----- |       |
| CAA90966 | MKTLLLT | TLV  | VAT  | -   | IV  | CL | DL  | GY  | T  | L | K  | C | N | -- | Q  | L | I    | P  | P | F | Y | K | T | C | A | A | G | K | N | L | C  | Y | K | M | F | M | V | ---- | AA   | P  | K | V  | P  | V  | K  | R     | G | C | I | D | V  | CP | K  | S | S | L | L | V | K | Y | V | -  | CC | NT | DR | C  | N      | ----- |       |
| CAB41507 | MKTLLLT | TLV  | VVVT | -   | IV  | CL | DL  | GY  | T  | L | K  | C | N | -- | Q  | H | I    | P  | P | F | Y | K | T | C | A | A | G | K | N | L | C  | Y | K | I | F | M | V | ---- | AA   | P  | K | V  | P  | V  | K  | R     | G | C | I | D | V  | CP | K  | S | S | D | L | V | K | Y | V | -  | CC | NT | DR | C  | N      | ----- |       |
| AAB33649 | MKTLLLT | TTV  | VVT  | -   | IV  | CL | D   | E   | Y  | T | L  | K | C | N  | -- | K | L    | V  | P | L | F | Y | K | T | C | P | A | G | K | N | L  | C | Y | K | M | F | M | V    | ---- | AT | P | K  | V  | P  | V  | K     | R | G | C | I | D  | V  | CP | K | S | S | L | L | V | K | Y | V  | -  | CC | NT | DR | C      | N     | ----- |
| AAC27686 | MKTLLLT | TLV  | VVT  | -   | TV  | CL | DL  | GY  | T  | L | K  | C | N | -- | K  | L | V    | P  | L | F | Y | K | T | C | P | A | G | K | N | L | C  | Y | K | M | Y | M | V | ---- | AT   | P  | K | V  | P  | V  | K  | R     | G | C | I | D | V  | CP | K  | S | S | L | L | V | K | Y | V | -  | CC | NT | DR | C  | N      | ----- |       |
| P60303   | MKTLLLT | TLV  | VVT  | -   | IV  | CL | DL  | GY  | T  | L | K  | C | N | -- | K  | L | V    | P  | L | F | Y | K | T | C | P | A | G | K | N | L | C  | Y | K | M | F | M | V | ---- | AT   | P  | K | V  | P  | V  | K  | R     | G | C | I | D | V  | CP | K  | S | S | L | L | V | K | Y | V | -  | CC | NT | DR | C  | N      | ----- |       |
| AAC27686 | MKTLLLT | TLV  | VVT  | -   | TV  | CL | DL  | GY  | T  | L | K  | C | N | -- | K  | L | V    | P  | L | F | Y | K | T | C | P | A | G | K | N | L | C  | Y | K | M | Y | M | V | ---- | AT   | P  | K | V  | P  | V  | K  | R     | G | C | I | D | V  | CP | K  | S | S | L | L | V | K | Y | V | -  | CC | NT | DR | C  | N      | ----- |       |
| CAA90963 | MKTLLLT | TLV  | VVT  | -   | IV  | CL | DL  | GY  | T  | L | K  | C | N | -- | K  | L | V    | P  | L | F | Y | K | T | C | P | A | G | K | N | L | C  | Y | K | M | F | M | V | ---- | AT   | P  | K | V  | P  | V  | K  | R     | G | I | D | V | CP | K  | S  | S | L | L | V | K | Y | V | - | CC | NT | DR | C  | N  | -----  |       |       |
| CAB42055 | MKTLLLT | LT   | EEET | -   | IV  | CL | DL  | GY  | T  | L | K  | C | N | -- | K  | L | V    | P  | L | F | Y | K | T | C | P | A | G | K | N | L | C  | Y | K | M | F | M | V | ---- | AT   | P  | K | V  | P  | V  | K  | R     | G | C | I | D | V  | CP | K  | S | S | L | L | V | K | Y | V | -  | CC | NT | DR | C  | N      | ----- |       |
| AAC27687 | MKTLLLT | TLV  | LVT  | -   | IV  | CL | DL  | GY  | T  | L | K  | C | N | -- | K  | L | V    | P  | L | F | Y | K | T | C | P | A | G | K | N | L | C  | Y | K | M | Y | M | V | ---- | AT   | P  | K | V  | P  | V  | K  | R     | G | C | I | D | V  | Y  | P  | K | S | S | L | L | V | K | Y | V  | -  | CC | NT | DR | C      | N     | ----- |
| AAB18383 | MKTLLLT | TLV  | VVT  | -   | IV  | CL | DL  | GY  | T  | L | K  | C | N | -- | K  | L | V    | P  | L | F | Y | K | T | C | P | A | G | K | N | L | C  | Y | K | M | F | M | V | ---- | AT   | P  | K | V  | P  | V  | K  | R     | G | C | I | D | V  | CP | K  | N | S | L | L | V | K | Y | V | -  | CC | NT | DR | C  | N      | ----- |       |
| AAC27689 | MKTLLLT | TLV  | VVT  | -   | IV  | CL | DL  | GY  | T  | L | K  | C | N | -- | K  | L | V    | P  | L | F | Y | K | T | C | P | A | G | K | N | L | C  | Y | K | M | F | M | V | ---- | AM   | P  | K | V  | P  | V  | K  | R     | G | C | I | D | V  | CP | K  | S | S | L | L | V | K | Y | V | -  | CC | NT | DR | C  | N      | ----- |       |
| AAC27690 | MKTLLLT | TLV  | VVT  | -   | IV  | CL | DL  | GY  | T  | L | K  | C | N | -- | K  | L | V    | P  | L | F | Y | K | T | C | P | A | G | K | N | L | C  | Y | K | M | Y | M | V | ---- | AM   | P  | K | V  | P  | V  | K  | R     | G | C | I | D | V  | CP | K  | S | S | L | L | V | K | Y | V | -  | CC | NT | DR | C  | N      | ----- |       |
| AAA66026 |         |      |      |     |     |    |     |     |    | L | K  | C | N | -- | K  | L | V    | P  | L | F | Y | K | T | C | P | A | G | K | N | L | C  | Y | K | M | F | M | V | ---- | SN   | K  | M | V  | P  | V  | K  | R     | G | C | I | D | V  | CP | K  | S | S | L | L | V | K | Y | V | -  | CC | NT | DR | C  | N      | ----- |       |
| P01446   |         |      |      |     |     |    |     |     |    | L | K  | C | N | -- | K  | L | I    | P  | L | A | Y | K | T | C | P | A | G | K | N | L | C  | Y | K | M | F | M | V | ---- | SN   | K  | T | V  | P  | V  | K  | R     | G | C | I | D | V  | CP | K  | N | S | L | L | V | K | Y | V | -  | CC | NT | DR | C  | N      | ----- |       |
| P60306   |         |      |      |     |     |    |     |     |    | L | K  | C | N | -- | K  | L | K    | P  | L | A | Y | K | T | C | P | A | G | K | N | L | C  | Y | K | M | F | M | M | ---- | SN   | K  | T | V  | P  | V  | K  | R     | G | C | I | D | V  | CP | K  | N | S | L | L | V | K | Y | V | -  | CC | NT | DR | C  | N      | ----- |       |
| P25668   |         |      |      |     |     |    |     |     |    | L | K  | C | N | -- | K  | L | I    | P  | L | A | Y | K | T | C | P | A | G | K | N | L | C  | Y | K | M | F | M | V | ---- | SN   | K  | T | V  | P  | V  | K  | R     | G | C | I | D | V  | CP | K  | N | S | L | V | L | K | Y | V | -  | CC | NT | DR | C  | N      | ----- |       |
| P01440   |         |      |      |     |     |    |     |     |    | L | K  | C | N | -- | K  | L | I    | P  | L | A | Y | K | T | C | P | A | G | K | N | L | C  | Y | K | M | Y | M | V | ---- | SN   | K  | T | V  | P  | V  | K  | R     | G | C | I | D | V  | CP | K  | N | S | L | V | L | K | Y | E | -  | CC | NT | DR | C  | N      | ----- |       |
| AAC61318 |         |      |      |     |     |    |     |     |    | L | K  | C | N | -- | K  | L | V    | P  | L | F | Y | K | T | C | P | A | G | K | N | L | C  | Y | K | M | F | M | V | ---- | SN   | K  | T | V  | P  | V  | K  | R     | G | C | I | D | V  | CP | K  | N | S | A | L | V | K | Y | V | -  | CC | NT | DR | C  | N      | ----- |       |
| P01391   |         |      |      |     |     |    |     |     |    | L | K  | C | N | -- | K  | L | I    | P  | L | A | Y | K | T | C | P | A | G | K | N | L | C  | Y | K | M | F | M | V | ---- | SN   | K  | T | V  | P  | V  | K  | R     | G | C | I | D | A  | CP | K  | N | S | L | L | V | K | Y | V | -  | CC | NT | DR | C  | N      | ----- |       |
| AAC61318 |         |      |      |     |     |    |     |     |    | L | K  | C | N | -- | K  | L | V    | P  | L | F | Y | K | T | C | P | A | G | K | N | L | C  | Y | K | M | F | M | V | ---- | SN   | K  | T | V  | P  | V  | K  | R     | G | C | I | D | V  | CP | K  | N | S | A | L | V | K | Y | V | -  | CC | NT | DR | C  | N      | ----- |       |
| AAB86637 |         |      |      |     |     |    |     |     |    | R | K  | C | N | -- | K  | L | V    | P  | L | F | Y | K | T | C | P | A | G | K | N | L | C  | Y | K | M | F | M | V | ---- | SN   | L  | T | V  | P  | V  | K  | R     | G | C | I | D | V  | CP | K  | N | S | A | L | V | K | Y | V | -  | CC | NT | DR | C  | N      | ----- |       |
| P01443   | MKTLLLT | TLV  | VVT  | -   | IV  | CL | DL  | GY  | T  | R | K  | C | N | -- | K  | L | V    | P  | L | F | Y | K | T | C | P | A | G | K | N | L | C  | Y | K | M | F | M | V | ---- | SN   | L  | T | V  | P  | V  | K  | R     | G | C | I | D | V  | CP | K  | N | S | A | L | V | K | Y | V | -  | CC | NT | DR | C  | N      | ----- |       |
| P01442   | MKTLLLT | TLV  | VVT  | -   | IV  | CL | DL  | GY  | T  | L | K  | C | N | -- | K  | L | V    | P  | L | F | Y | K | T | C | P | A | G | K | N | L | C  | Y | K | M | F | M | V | ---- | SN   | L  | T | V  | P  | V  | K  | R     | G | C | I | D | V  | CP | K  | N | S | A | L | V | K | Y | V | -  | CC | NT | DR | C  | N      | ----- |       |
| P60310   | MKTLLLT | TL   | L    | VVT | -   | IV | CL  | DL  | GY | T | L  | K | C | N  | -- | K | L    | V  | P | L | F | Y | K | T | C | P | A | G | K | N | L  | C | Y | K | M | F | M | V    | ---- | SN | L | T  | V  | P  | V  | K     | R | G | C | I | D  | V  | CP | K | N | S | A | L | V | K | Y | V  | -  | CC | NT | DR | C      | N     | ----- |
| P01442   | MKTLLLT | TLV  | VVT  | -   | IV  | CL | DL  | GY  | T  | L | K  | C | N | -- | K  | L | V    | P  | L | F | Y | K | T |   |   |   |   |   |   |   |    |   |   |   |   |   |   |      |      |    |   |    |    |    |    |       |   |   |   |   |    |    |    |   |   |   |   |   |   |   |   |    |    |    |    |    |        |       |       |

|          |                        |         |          |       |                |          |      |     |                 |               |             |         |          |                  |                   |                  |
|----------|------------------------|---------|----------|-------|----------------|----------|------|-----|-----------------|---------------|-------------|---------|----------|------------------|-------------------|------------------|
| P79810   | MKTLLLTLVVVT-IVCLDLGYT | LKCN--- | KLIPIASK | TC    | PAGKNLCYKMFMM  | ----     | SDLT | IPV | KRG             | CIDV          | CPKNSHLVKYV | -       | CCNTDRCN | -----            |                   |                  |
| CAA90962 | MKTLLLTLVVVT-IVCLDLGYT | LKCN--- | KLIPIASK | TC    | PAGKNLCYKMFMM  | ----     | SDLT | IPV | KRG             | CIDV          | CPKNSLLVKYV | -       | CCNTHRCN | -----            |                   |                  |
| P25673   |                        |         | ITCY--   | KTP   | IPITSETCAPGQNL | CYTKTW   | CD   | AW  | CGSRGKVI        | LGCAAT        | CPTV        | ESYQDIK | -        | CCSTDDCNPHPKQKRP |                   |                  |
| P01382   |                        |         | IRCF--   | ITP   | DITSKDCPNG     | HVCYTKTW | CD   | AF  | CSIRGKRVDLGCAAT | CPTV          | KTGV        | DIQ     | -        | CCSTDNCNPFPTRKRP |                   |                  |
| P01427   |                        |         | IRCF--   | ITP   | DITSKDCPNG     | HVCYTKTW | CD   | AF  | CSIRGKRVDLGCAAT | CPTV          | KTGV        | DIQ     | -        | CCSTDDCDPFPTRKRP |                   |                  |
| P29180   |                        |         | IRCF--   | ITP   | DITSKDCPNG     | HVCYTKTW | CD   | GF  | CRIRGERVDLGCAAT | CPTV          | KTGV        | DIQ     | -        | CCSTDDCDPFPTRKRP |                   |                  |
| P29181   |                        |         | IRCF--   | ITP   | DITSKDCPNG     | HVCYTKTW | CD   | GF  | CSRRGERVDLGCAAT | CPTV          | KTGV        | DIQ     | -        | CCSTDDCDPFPTRKRP |                   |                  |
| P25672   |                        |         | IRCF--   | ITP   | DITSKDCPNG     | HVCYTKTW | CD   | GF  | CS              | SRGKRVDLGCAAT | CPTV        | RTGV    | DIQ      | -                | CCSTDDCDPFPTRKRP  |                  |
| P25671   |                        |         | IRCF--   | ITP   | DITSKDCPNG     | HVCYTKTW | CD   | GF  | CSIRGKRVDLGCAAT | CPTV          | RTGV        | DIQ     | -        | CCSTDDCDPFPTRKRP |                   |                  |
| CAA90966 |                        |         | IRCF--   | ITP   | DITSKDCPNG     | HVCYTKTW | CD   | GF  | CS              | SRGKRVDLGCAAT | CPTV        | RTGV    | DIQ      | -                | CCSTDDC--PFPTRKRP |                  |
| AAL87469 | MKTLLLTLVLVT-IMCLDLGYT | IRCF--  | ITP      | DVTST | DCPNG          | HVCYTKTW | CD   | GF  | CS              | SRG--RV       | LGCAAT      | CPTV    | KPGV     | DIQ              | -                 | CCSTDNCNPFPTR--P |
