# Supplementary material for: Role of accelerated segment switch in exons to alter targeting (ASSET) in the molecular evolution of snake venom proteins
Source: PubMed Central journal article supplement (PMC2711939; doi:10.1186/1471-2148-9-146), 2009-06-30
Supplement: 1471-2148-9-146-S3.pdf [file 1471-2148-9-146-S3.pdf]

**Additional file 3:** Segment S2 (Figure 1) of three-finger toxins Q8UUK0 and P01443 showing deletion and addition of nucleotides (red color) in the segment.

AGGAAATGTCACAA-CTCACCACCTTTCACTAGTCTATCAGACTTCTCCA  
AGGAAATGTAACAAACTCGTTCCTTT----ATTCTATAAGACTTCTCCA
